# Supplementary material for: Precise construction of lithiophilic sites by diyne-linked phthalocyanine polymer for suppressing metallic lithium dendrite
Source: Royal Society of Chemistry journal article supplement (doi:10.1039/d2dt00406b), 2022-01-01
Supplement: d2dt00406b1.pdf [file d2dt00406b1.pdf]

**Precise lithiophilic sites by diyne-linked phthalocyanine polymer  
for suppressing metallic lithium dendrite**

**Yu Gu<sup>a</sup>, Chunhua Li<sup>a</sup>, Yingbin Wang<sup>a</sup>, Wenxin Lu<sup>b</sup>, Hong Shang<sup>a,\*</sup>, Bing Sun<sup>a,\*</sup>**

<sup>a</sup> School of Science, China University of Geosciences (Beijing), Beijing, 100084,  
China

<sup>b</sup> College of Chemical and Biological Engineering, Shandong University of Science  
and Technology, Qingdao, 266590, China

Corresponding Author: [shanghong@cugb.edu.cn](mailto:shanghong@cugb.edu.cn); [sunbing@cugb.edu.cn](mailto:sunbing@cugb.edu.cn)

## Experimental details:

### *Synthesis of 2(3),9(10),16(17),23(24)-tetraiodophthalocyanine $H_2Pc(I)_4$*

In a typical experiment, 4-iodophthalonitrile (1.0 g, 4.0 mmol) and DBU (0.4 mL) in n-pentanol (8.0 mL) was heated to reflux under nitrogen for 4 h. After being cooled to room temperature, the volatiles were removed under reduced pressure and the residue was purified by a silica gel column using  $CH_2Cl_2$ /hexane (V/V, 6/1) as eluent. Repeated chromatography followed by recrystallization from  $CH_2Cl_2$  and  $CH_3OH$  gave a purified product  $H_2Pc(I)_4$  (450 mg, 44%) as green powder.

### *Synthesis of 4,4',4'',4'''-(phthalocyanine-2(3),9(10),16(17),23(24)-tetrayl)tetrakis(2-methylbut-3-yn-2-ol) $H_2Pc(etylnol)_4$*

A mixture of  $H_2Pc(I)_4$  (172 mg, 0.17 mmol), methyl butynol (366  $\mu$ L),  $Pd(PPh_3)_2Cl_2$  (1.5 mg, 0.002 mmol) and CuI (0.15 mg, 0.0008 mmol) in THF (2 mL) and  $Et_3N$  (4 ml) were stirred under room temperature in nitrogen atmosphere for 24 h. Then, the volatiles were removed under reduced pressure and the residue was purified by a silica gel column using THF/hexane (V/V, 6/1) as eluent. Repeated chromatography followed by recrystallization from THF and hexane gave a purified product  $H_2Pc(etylnol)_4$  (45.9 mg, 32%) as green powder.

### *Synthesis of 2(3),9(10),16(17),23(24)-tetraethynylphthalocyanine $H_2Pc(ethynyl)_4$*

A mixture of  $H_2Pc(etylnol)_4$  (132 mg, 0.16 mmol) and NaOH (74mg, 1.85 mmol) in THF (3 mL) and toluene (3 ml) was heated at 90 °C under nitrogen atmosphere for 12 h with a TLC monitoring. After being cooled to room temperature, the volatiles were removed under reduced pressure and the residue was purified by a silica gel column using THF as eluent. Repeated chromatography followed by recrystallization from THF and hexane gave a purified product  $H_2Pc(ethynyl)_4$  (29.3 mg, 30%) as green powder.

**Characterization:** Raman spectra were measured on Renishaw-2000 Raman spectrometer with a resolution of  $2\text{ cm}^{-1}$  from Ar laser, the excitation wavelength is 473 nm. XPS was performed on a Thermo Scientific ESCALab 250Xi instrument using 200 W monochromatic Al  $K\alpha$  radiation. XRD was measured using an empirical diffractometer and copper  $K\alpha$  radiation at a voltage of 40 kV, the output power is 1.6

kW. SEM measurements were performed on a Hitachi S-4800 field emission scanning electron microscope. TEM and HRTEM measurements were performed on a JEM-2100F electron microscope.

**Theoretical Calculation:** The first-principle calculations were conducted in DMol<sup>3</sup> module. Perdew-Burke-Ernzerhof (PBE) generalized-gradient approximation function was used in the dispersion correction. An all-electron double numerical basis set (DND basis set) was used during calculation. The k-points for Brillouin zone were selected as the gamma point, which is effective considering the large cell sizes of each dimension. A 2×2×1 supercell of a single-layer with a 1.5 nm vacuum layer distance was constructed to interact with Li polysulfides in each periodic system. The binding energy of Li and the substrate was defined as follows:

$$E_{\text{ads}} = E_{\text{Li-substrate}} - E_{\text{substrate}} - E_{\text{Li}}$$

where  $E_{\text{Li-substrate}}$ ,  $E_{\text{substrate}}$ , and  $E_{\text{Li}}$  are the total energies of PcEP bound with a Li atom, the PcEP substrate, and the single Li atom, respectively. Furthermore, the electron density difference ( $\rho_{\text{dif}}$ ) was calculated similarly as following:

$$\rho_{\text{dif}} = \rho_{\text{Li-substrate}} - \rho_{\text{substrate}} - \rho_{\text{Li}}$$

where the arithmetic between each cube file was processed on the modified Multiwfn (version 3.5) package sentences.

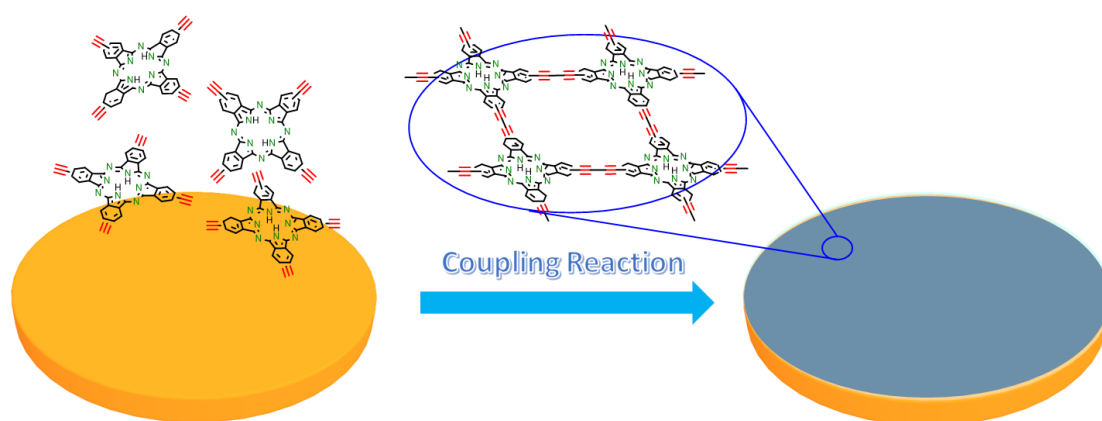

**Scheme S1.** In situ growth of PcEP on the copper foil surface.

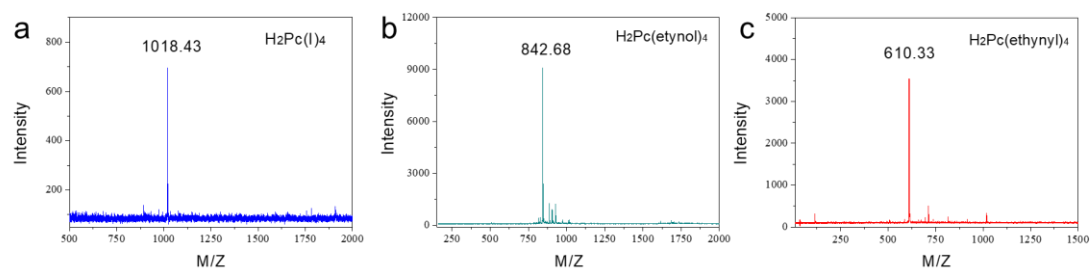

**Figure S1.** MS spectra of the phthalocyanines. (a) 2(3),9(10),16(17),23(24)-tetraiodophthalocyanine  $\text{H}_2\text{Pc}(\text{I})_4$ ; (b) 4,4',4'',4'''-(phthalocyanine-2(3),9(10),16(17),23(24)-tetrayl)tetrakis(2-methylbut-3-yn-2-ol)  $\text{H}_2\text{Pc}(\text{etynol})_4$ ; (c) 2(3),9(10),16(17),23(24)-tetraethynylphthalocyanine  $\text{H}_2\text{Pc}(\text{ethynyl})_4$ .

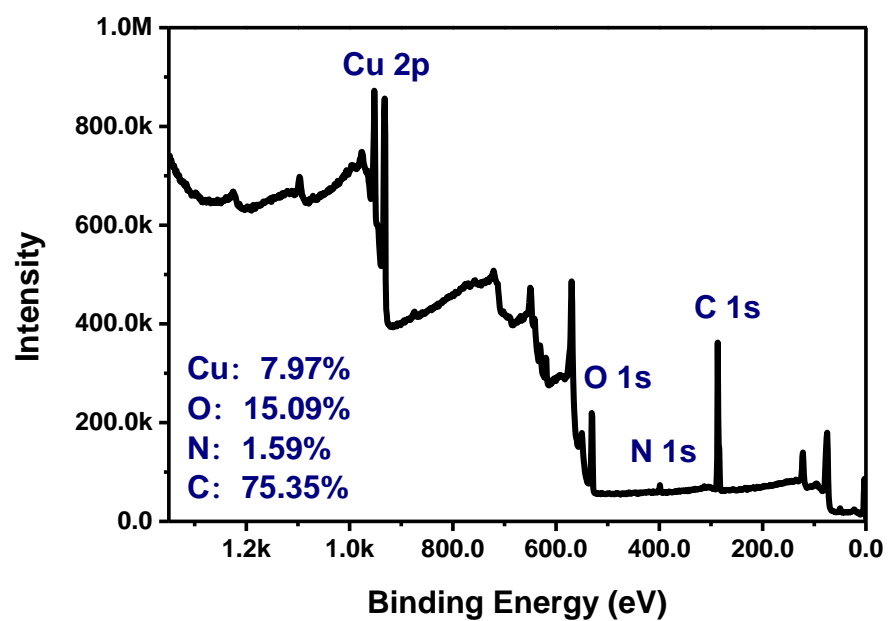

**Figure S2.** XPS survey spectrum of PcEP@Cu.

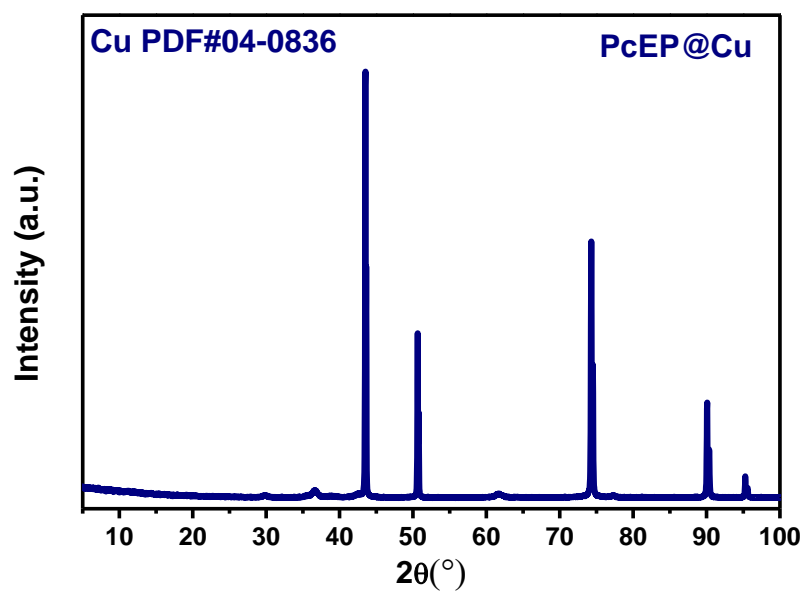

**Figure S3.** XRD patterns of PcEP@Cu.

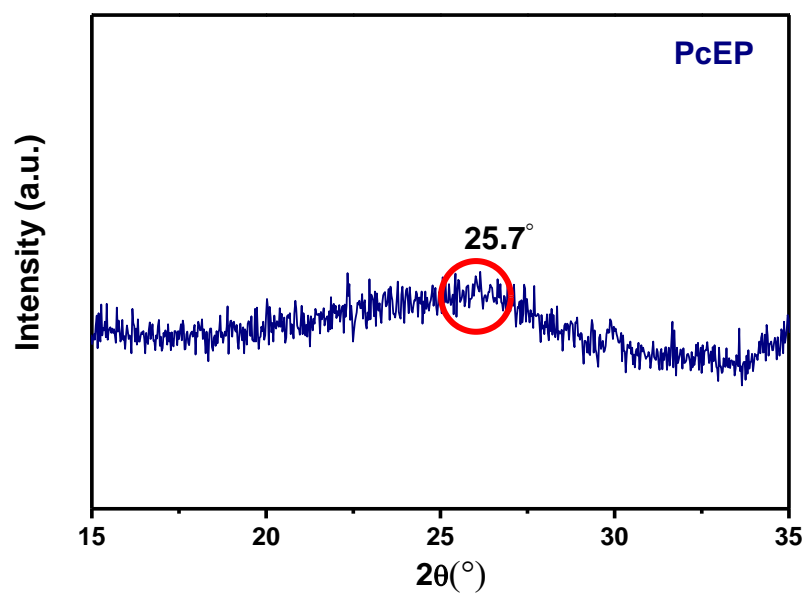

**Figure S4.** XRD patterns of PcEP.



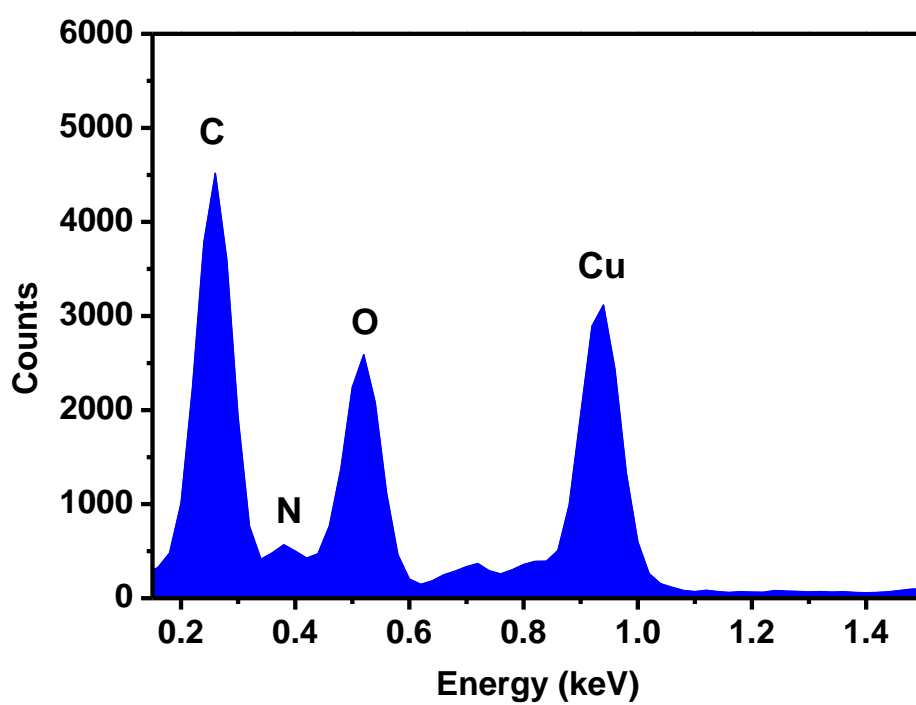

**Figure S5.** The EDS spectra plot of the PcEP film.

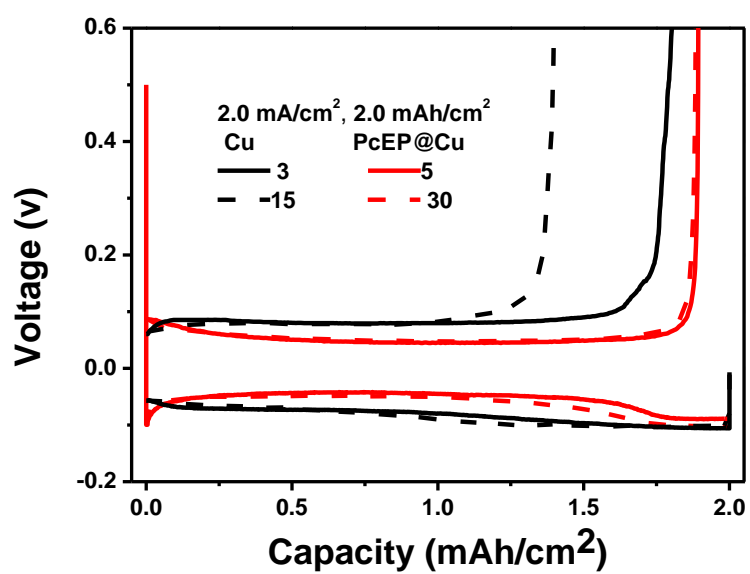

**Figure S6.** The charge/discharge voltage profiles at the current density of  $2.0 \text{ mA cm}^{-2}$  with a capacity of  $2.0 \text{ mAh cm}^{-2}$ .

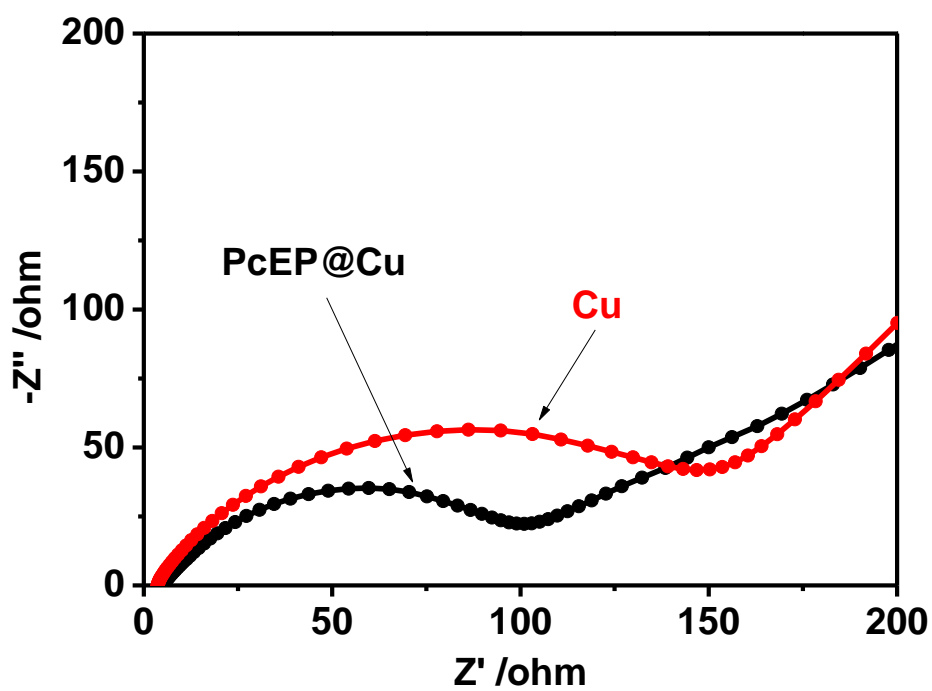

**Figure S7.** Impedance variations during cycling at a current density of  $1.0 \text{ mA cm}^{-2}$  with a capacity of  $1.0 \text{ mAh cm}^{-2}$  after 10 cycles.

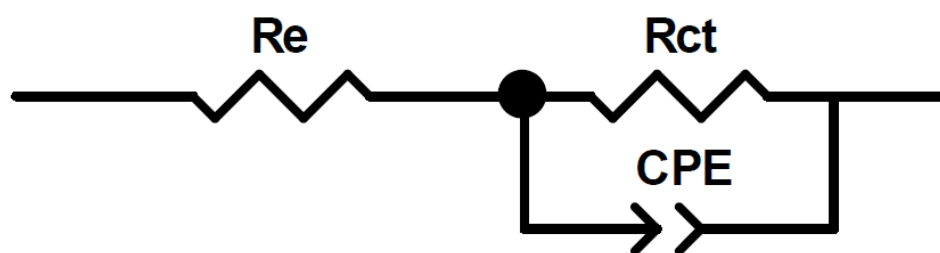

**Figure S8.** The equivalent electrical circuit for simulating the impedance spectra.

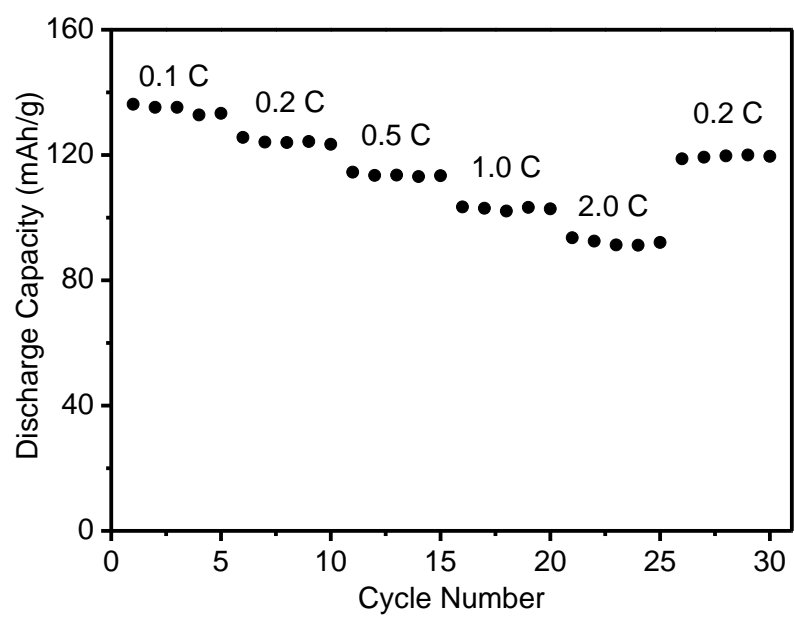

**Figure S9.** The rate capability of the full cell for PcEP@Cu|Li||LFP at various current rates from 0.1 to 2.0 C.

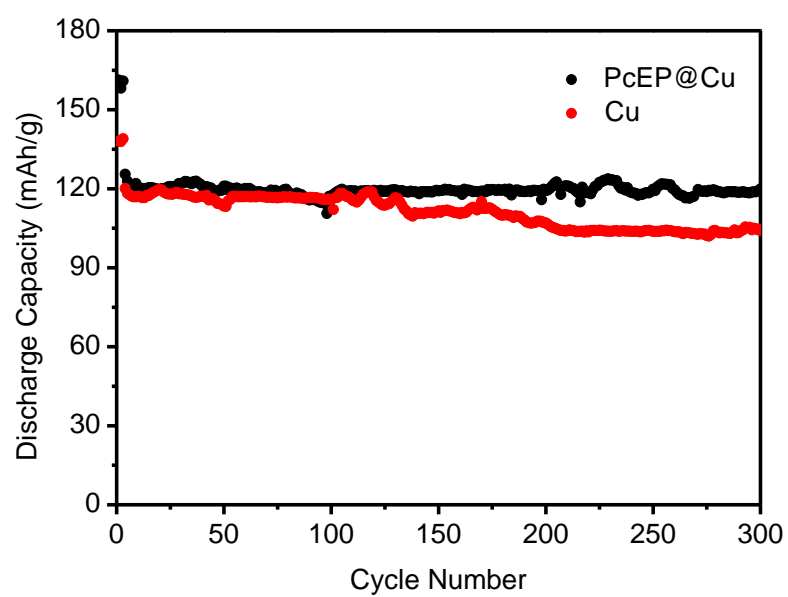

**Figure S10.** Long-term cycling behavior of the full cells for PcEP@Cu|Li||LFP and Cu|Li||LFP at the rate of 1 C.

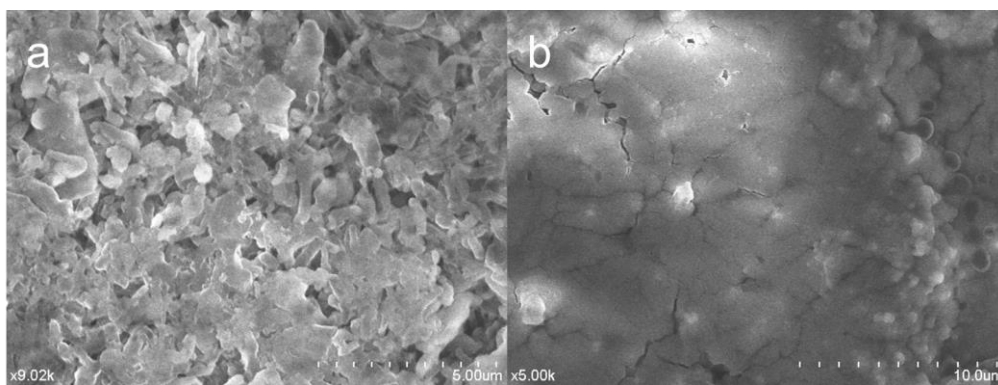

**Figure S11.** SEM images of continuous deposited Li on (a) Cu and (b) PcEP@Cu electrodes.
